# Supplementary material
Source: PubMed Central journal article supplement (PMC2886679)
Supplement: supp_japplphysiol.01293.2009_figs.pdf [file supp_japplphysiol.01293.2009_figs.pdf]

## Supplemental Figure 1

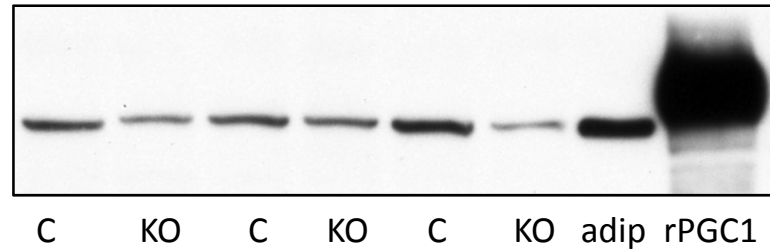

Supplemental Figure 1: PGC1 $\alpha$  content as detected with the Calbiochem antibody (Cat#516557). C = control mouse gastrocnemius. KO = mLKB1-KO gastrocnemius. Adip = brown adipose tissue. rPGC1 = recombinant flag-tagged mouse PGC1 $\alpha$ .

## Supplemental Figure 2

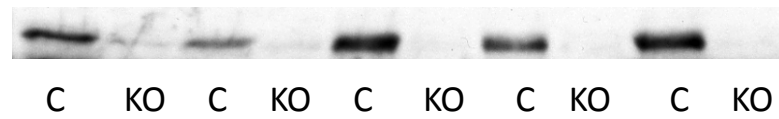

Supplemental Figure 2: LKB1 protein content in soleus muscle from control (C) and mLKB1-KO (KO) mice.
